# Supplementary material
Source: PubMed Central journal article supplement (PMC5599792)

# Source Data Figure 1

IB : anti-LC3B

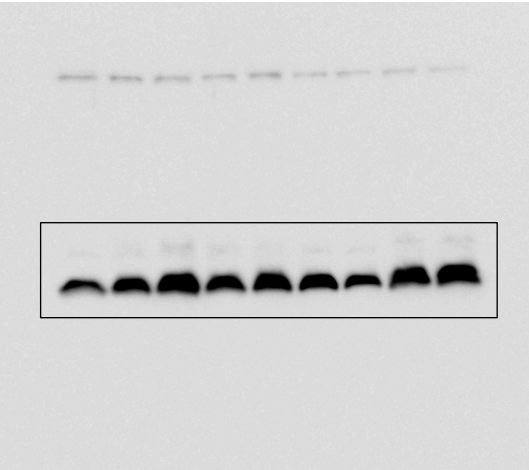

IB : anti-FLAG

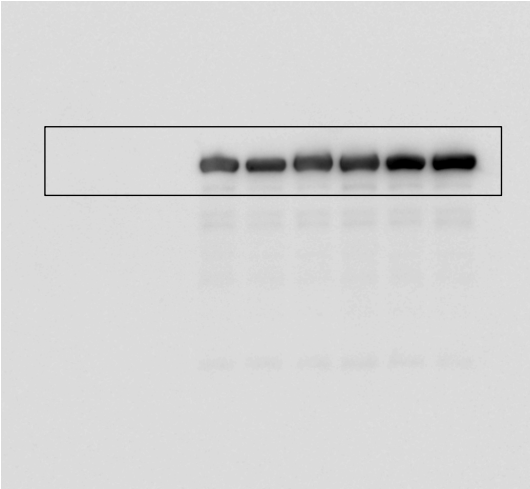

IB : anti-β-Actin

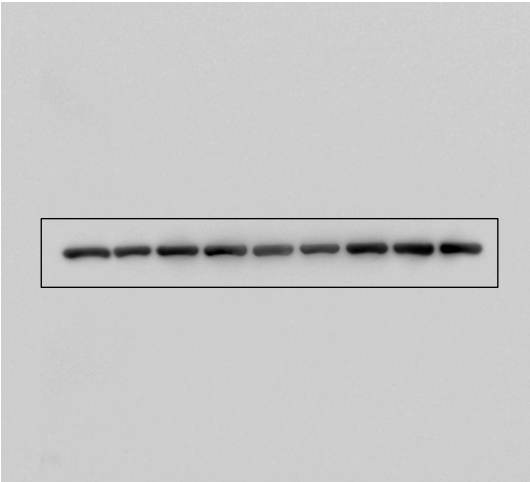

Supplement: EMBJ-36-2790-s003.pdf [file EMBJ-36-2790-s003.pdf]

# Source Data Figure 3

IB : anti-NDP52

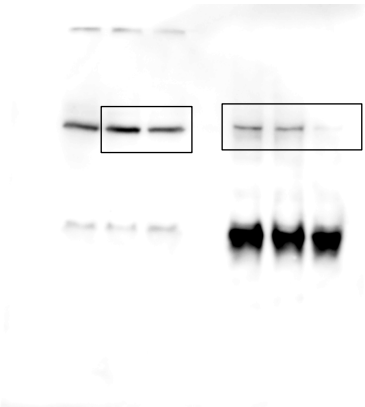

IB : anti-Rab35

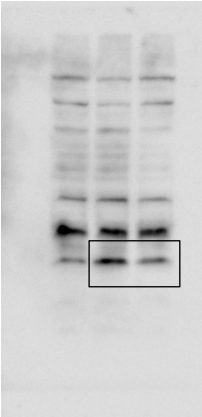

IB : anti-GFP

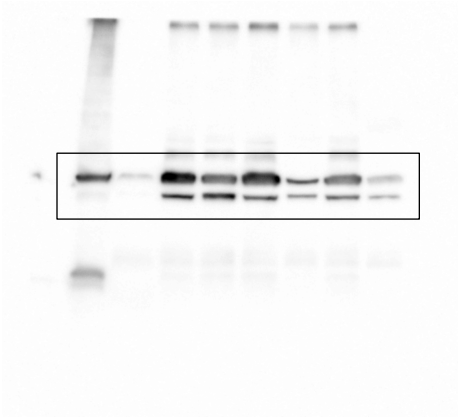

CBB

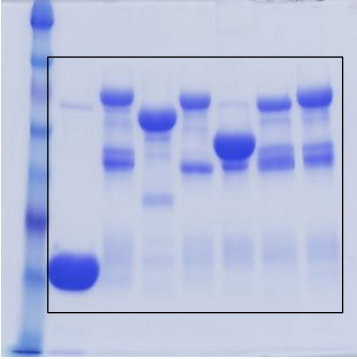

IB : anti-MBP

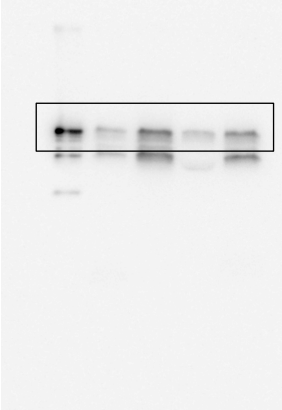

CBB

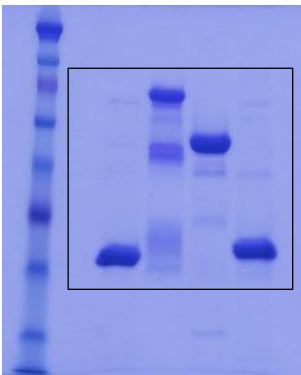

IB : anti-MBP

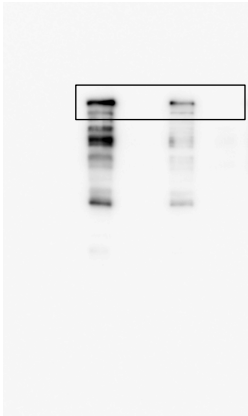

CBB

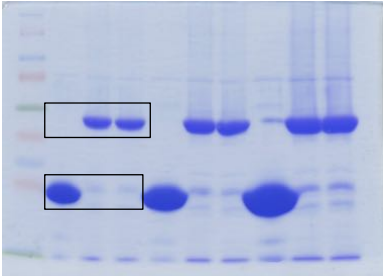

Supplement: EMBJ-36-2790-s005.pdf [file EMBJ-36-2790-s005.pdf]

# Source Data Figure 7

IB : anti-FLAG

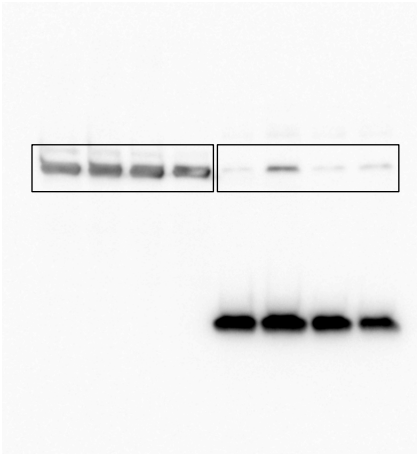

IB : anti-GFP

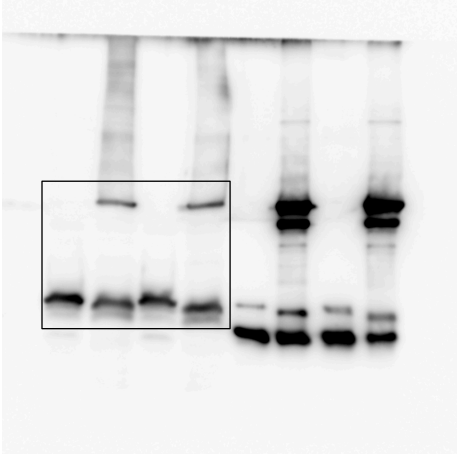

Supplement: EMBJ-36-2790-s009.pdf [file EMBJ-36-2790-s009.pdf]
